# Supplementary material for: Mineralization of phosphorylated cellulose/sodium alginate sponges as biomaterials for bone tissue engineering
Source: Royal Society of Chemistry journal article supplement (doi:10.1039/d1nj04397h), 2021-01-01
Supplement: d1nj04397h1.pdf [file d1nj04397h1.pdf]

## Mineralization of phosphorylated cellulose/ sodium alginate sponges as biomaterials for bone tissue engineering

Li Zha<sup>a</sup>, Yahui Zheng<sup>a</sup>, Jianfei Che<sup>\*a</sup> and Yinghong Xiao<sup>\*b</sup>

<sup>a</sup> Key Laboratory of Soft Chemistry and Functional Materials, Nanjing University of Science and Technology, Nanjing, China.

<sup>b</sup> Collaborative Innovation Center of Biomedical Functional Materials, Nanjing Normal University, Nanjing, China.

\* Correspondence Email: xiaoche@njnu.edu.cn (Jianfei Che); yhxiao@njnu.edu.cn (Yinghong Xiao)

### Supporting Figures

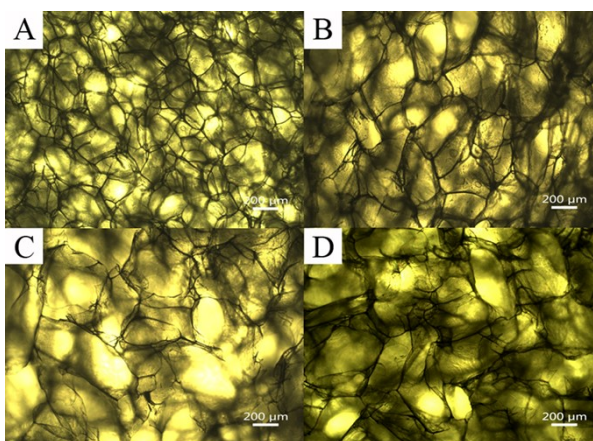

**Fig. S1** Optical microscope micrographs of cellulose/SA composite sponges: (A) Cellu/SA00, (B) Cellu/SA10, (C) Cellu/SA20 and (D) Cellu/SA30.

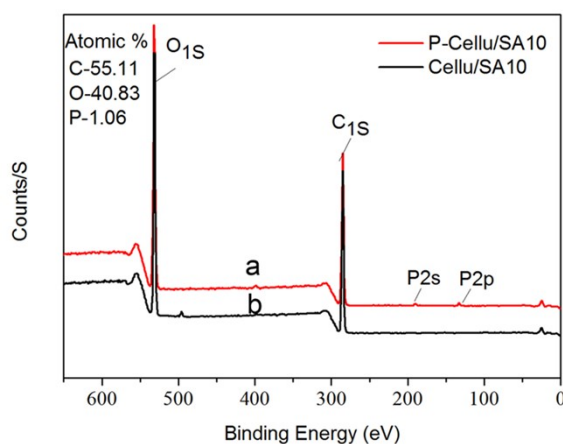

**Fig. S2** XPS survey spectra of Cellu/SA10 and P-Cellu/SA10.

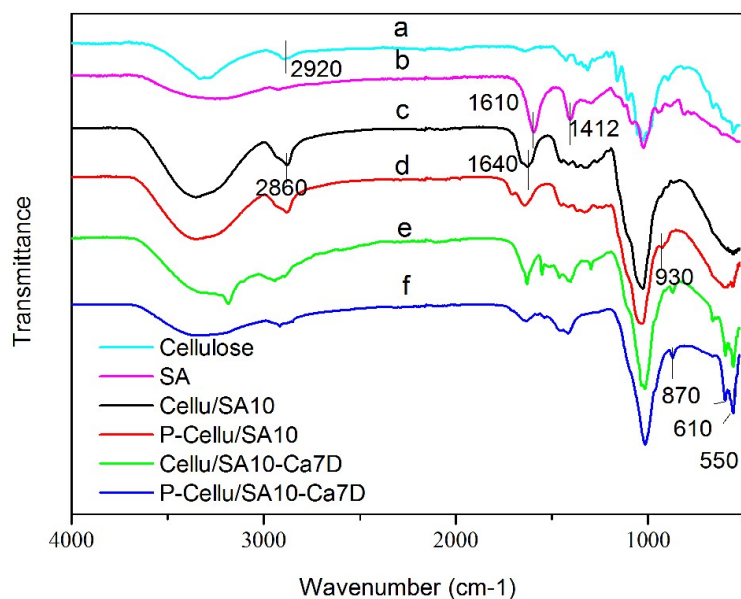

**Fig. S3** FTIR spectra of various samples: (a) Cellulose, (b) SA, (c) Cellu/SA10, (d) P-Cellu/SA10, (e) Cellu/SA10-Ca7D, (f) P-Cellu/SA10-Ca7D.

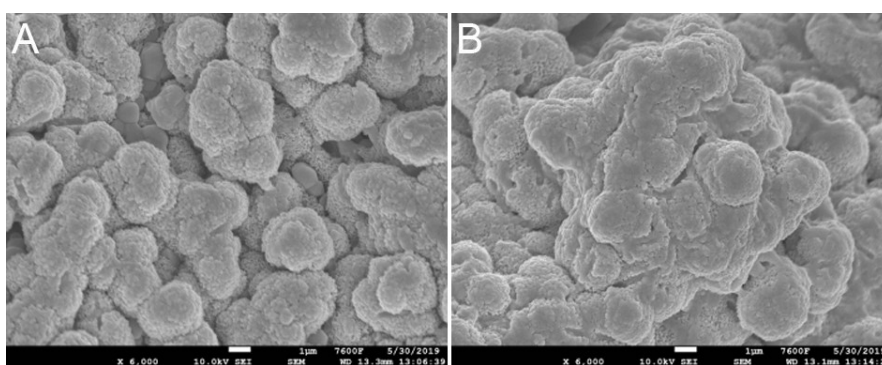

**Fig. S4** SEM of HA in P-Cellu/SA00-Ca7D(A) and P-Cellu/SA10-Ca7D(B)

## Supporting Table

**Table S1** Peak areas and relative atomic percentage of O1s moieties in Cellu/SA10 and P-Cellu/SA10.

|              | C-OH/C-O-C     | -COOR          | C-O-P         |
|--------------|----------------|----------------|---------------|
| Cellu/SA10   | 90486.600(53%) | 81486.600(47%) | 0             |
| P-Cellu/SA10 | 84042.770(50%) | 70647.880(41%) | 16042.770(9%) |

**Table S2** The Ca/P value of HA in P-Cellu/SA00-Ca7D and P-Cellu/SA10-Ca7D.

|            | P-Cellu/SA00-Ca7D | P-Cellu/SA10-Ca7D |
|------------|-------------------|-------------------|
| Ca (At%)   | 4.65              | 3.02              |
| P (At%)    | 3.47              | 2.08              |
| Ca/P ratio | 1.34              | 1.45              |

As shown in SEM (Fig S4), compared with phosphorilated Cellu, the spherical apatite nanoparticles of phosphorilated Cellu/SA10 were aggregated into bigger rod-like apatite crystals, which may be caused by the high surface energy and density of HA nanoparticle. On the other hand, the Ca/P value in the P-Cellu/SA00-Ca7D and P-Cellu/SA10-Ca7D were 1.34 and 1.45, respectively (Table S2). It is indicated that phosphorilated Cellu/SA10 has a good mineralization function than phosphorilated Cellu. This behavior can be explained by the appropriate aperture size of the Cellu/SA10 which provides the contact area between SBF and sponge and enhances mineralization.
